# Supplementary material
Source: MDPI journal article supplement (https://www.mdpi.com/2624-5558/1/1/6)
Supplement: s1 [file s1]

# Supplementary Materials:

## Effect of Heat Treatment of Martensitic Stainless Steel on Passive Layer Growth Kinetics Studied by Electrochemical Impedance Spectroscopy in Conjunction with the Point Defect Model

Ingmar Bösing \*, Georg Marquardt and Jorg Thöming

Chemical Process Engineering, University of Bremen, Leobener Strasse 6, 28359 Bremen, Germany; gjm@gmx.de (G.M.); thoeming@uni-bremen.de (J.T.)

\*Correspondence: ingmar.boesing@uni-bremen.de

### Mott-Schottky Analysis

Mott-Schottky analysis were done to ensure n-type behavior of the passive layer at the polarization potential (0.6 V). Figure S1 shows the Mott-Schottky plot of a selected sample ( $T_A$ : 1200 °C). The passive film shows a positive slope between 300 and 900 mV indicating n-type behavior. Figure S2 shows the calculated defect densities  $N_D$  for all samples.  $N_D$  was calculated by the Mott-Schottky equation:

$$\frac{1}{C_{sc}^2} = \frac{2}{\epsilon \epsilon_0 e N_D} \left( E - E_{fb} - \frac{kT}{e} \right) \quad (SI1)$$

in which  $\epsilon$  describes the permittivity of the oxide (that can be assumed as 12 for oxide layers on stainless steel [33]),  $\epsilon_0$  the permittivity of the vacuum ( $8.85 \times 10^{-12}$  C/(Vm)),  $e$  the elementary charge of an electron ( $1.902 \times 10^{-19}$  C),  $E_{fb}$  the flatband potential,  $k$  the Boltzmann constant ( $1.38 \times 10^{-23}$  J/K),  $T$  the temperature, and  $N_D$  concentration of dopants.

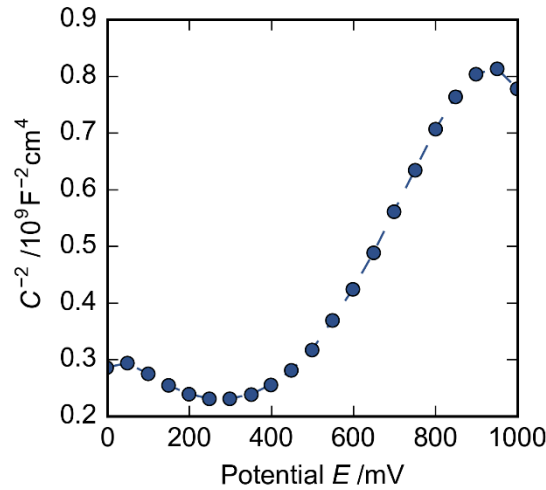

**Figure 1.** Mott-Schottky plot of martensitic stainless steel sample (austenitizing temperature  $T_A$ : 1200 °C) after passive film formation at 600 mV for 1800 s.

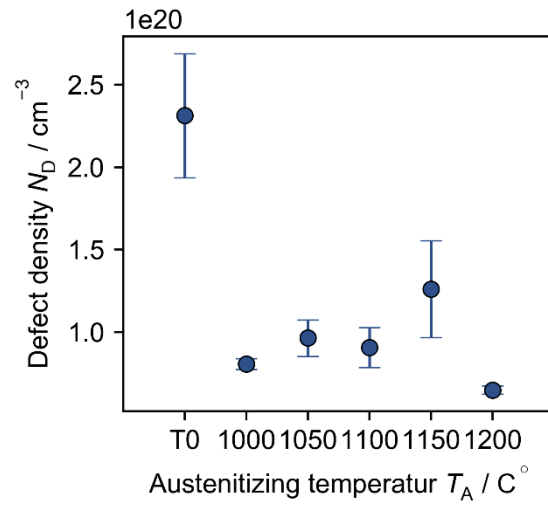

**Figure 2.** Calculated defect densities of the passive layer of martensitic stainless steel after different heat treatments.
